# Supplementary material for: Characterization of a Bacteriophage GEC_vB_Bfr_UZM3 Active against Bacteroides fragilis
Source: MDPI journal article supplement (doi:10.3390/v15051042), 2023-04-25
Supplement: s1 [file s1]

## B.fragilis isolates

| Name |       | Origin                          | VA7             |                 |                 | MTK             |                 |                 | UZM3/ A7        |                 |                 | UZM3 /UZ-10     |                 |                 |
|------|-------|---------------------------------|-----------------|-----------------|-----------------|-----------------|-----------------|-----------------|-----------------|-----------------|-----------------|-----------------|-----------------|-----------------|
|      |       | Titer                           | 10 <sup>8</sup> | 10 <sup>7</sup> | 10 <sup>6</sup> | 10 <sup>8</sup> | 10 <sup>7</sup> | 10 <sup>6</sup> | 10 <sup>8</sup> | 10 <sup>7</sup> | 10 <sup>6</sup> | 10 <sup>8</sup> | 10 <sup>7</sup> | 10 <sup>6</sup> |
| 1    | A5    | Fecal sample (Georgia)          | 1               | R               | R               | 2               | 1               | R               | 3               | 2               | 1               | R               | R               | R               |
| 2    | A6    | Fecal sample (Georgia)          | 4               | 4               | 4               | 3               | 2               | 1               | 3               | 2               | 1               | 3               | 2               | 1               |
| 3    | A7    | Fecal sample (Georgia)          | 3               | 2               | 1               | 3               | 2               | 1               | 3               | 2               | 1               | 3               | 2               | 1               |
| 4    | E6    | Fecal sample (Georgia)          | 4               | 4               | 4               | 3               | 2               | 1               | 3               | 2               | 1               | R               | R               | R               |
| 5    | 33    | Peritonitis (Belgium)           | 3               | 2               | 1               | 3               | 2               | 1               | 3               | 2               | 1               | R               | R               | R               |
| 6    | S11   | Fecal sample (Georgia)          | 4               | 4               | 4               | 4               | 4               | 4               | 4               | 4               | 4               | 2               | R               | R               |
| 7    | UZ-10 | Osteomyelitis drainage(Belgium) | R               | R               | R               | R               | R               | R               | R               | R               | R               | 4               | 3               | 2               |
| 8    | S18   | Fecal sample (Georgia)          | R               | R               | R               | R               | R               | R               | R               | R               | R               | R               | R               | R               |
| 9    | E8    | Fecal sample (Georgia)          | R               | R               | R               | R               | R               | R               | R               | R               | R               | R               | R               | R               |
| 10   | S16   | Fecal sample (Georgia)          | 1               | R               | R               | 2               | 1               | R               | 1               | 1               | R               | R               | R               | R               |
| 11   | E1    | Fecal sample (Georgia)          | R               | R               | R               | 1               | R               | R               | R               | R               | R               | R               | R               | R               |
| 12   | S10   | Fecal sample (Georgia)          | R               | R               | R               | R               | R               | R               | R               | R               | R               | 3               | 2               | 1               |
| 13   | E3    | Fecal sample (Georgia)          | 2               | R               | R               | 2               | R               | R               | 2               | 1               | R               | 3               | 2               | 1               |
| 14   | S1    | Fecal sample (Georgia)          | R               | R               | R               | R               | R               | R               | R               | R               | R               | R               | R               | R               |
| 15   | S2    | Fecal sample (Georgia)          | 4               | 3               | 3               | 4               | 4               | 4               | 4               | 4               | 3               | R               | R               | R               |
